# Supplementary material for: Anisotropic structure deformation of β-octahydro-1,3,5,7-tetranitro-1,3,5,7-tetrazocine under high pressure: vibration spectra calculation and resolution based on AIMD simulation
Source: Royal Society of Chemistry journal article supplement (doi:10.1039/d3cp03422d), 2023-01-01
Supplement: d3cp03422d1.pdf [file d3cp03422d1.pdf]

## Supporting Information

### **The Anisotropic Structure Deformation of $\beta$ -Octahydro-1,3,5,7-tetranitro-1,3,5,7-tetrazocine under High Pressure: A Vibration Spectra Calculation and Resolving Based on AIMD Simulation**

*Yao-Yao Huang,<sup>1,2</sup> Zheng-Hua He,<sup>1,\*</sup> and Guang-Fu Ji<sup>1</sup>*

*<sup>1</sup>National Key Laboratory of Shock Wave and Detonation Physics, Institute of Fluid Physics,  
China Academy of Engineering Physics, Mianyang 621900, Sichuan, China.*

*<sup>2</sup>Hypervelocity Aerodynamics Institute, China Aerodynamics Research and Development center,  
Mianyang 621000, Sichuan, China.*

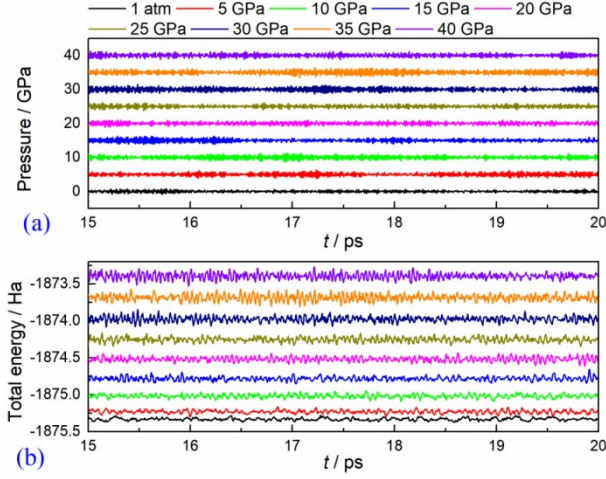

Fig. S1 Pressure and total energy evolution versus simulation time.

Tab. 1 Vibrational modes for Raman frequencies.

| Raman | Vibration mode                                               | Raman | Vibration mode                                                         |
|-------|--------------------------------------------------------------|-------|------------------------------------------------------------------------|
| 118   | $\tau(\text{ring})$                                          | 1028  | $\tau(\text{ring})$                                                    |
| 143   | $\tau(\text{ring})+\tau(\text{NO}_2)$                        | 1059  | $\tau(\text{ring})+\gamma(\text{NO}_{2\text{-axial}})$                 |
| 155   |                                                              | 1128  | $\tau(\text{ring})+\rho(\text{CH}_2)$                                  |
| 181   |                                                              | 1170  | $\tau(\text{ring})$                                                    |
| 211   | $\tau(\text{ring})$                                          | 1179  | $\tau(\text{ring})+\nu(\text{NO}_{2\text{-axial}})$                    |
| 221   | $\tau(\text{ring})+\gamma(\text{NO}_2)$                      | 1202  | $\nu(\text{NO}_{2\text{-equatorial}})+\rho(\text{CH}_2)$               |
| 285   |                                                              | 1251  | $\nu(\text{ring})+\gamma(\text{NO}_2)+\delta(\text{CH}_2)$             |
| 295   | $\tau/\nu(\text{ring})$                                      | 1324  |                                                                        |
| 354   |                                                              | 1401  | $\nu_{\text{as}}(\text{NO}_{2\text{-equatorial}})+\omega(\text{CH}_2)$ |
| 428   | 1451                                                         |       |                                                                        |
| 460   | $\gamma(\text{NO}_2)$                                        | 1532  | $\nu_{\text{as}}(\text{NO}_2)$                                         |
| 493   | $\tau(\text{ring})+\gamma(\text{NO}_2)$                      | 1623  |                                                                        |
| 603   |                                                              | 1683  | $\tau(\text{ring})+\gamma(\text{NO}_2)$                                |
| 642   | $\gamma(\text{NO}_2)$                                        | 1900  | $\nu_{\text{as}}(\text{NO}_{2\text{-axial}})$                          |
| 702   | $\tau(\text{ring})+\gamma(\text{NO}_2)$                      | 1926  |                                                                        |
| 783   | $\tau(\text{ring})+\gamma(\text{NO}_2)+\gamma(\text{C H}_2)$ | 3109  | $\nu_{\text{s}}(\text{CH}_2)$                                          |
| 829   | $\tau(\text{ring})+\nu(\text{NO}_{2\text{-axial}})$          | 3163  | $\nu_{\text{as}}(\text{CH}_2)$                                         |
| 879   | $\tau(\text{ring})$                                          | 3222  |                                                                        |
| 902   | $\tau(\text{ring})+\gamma(\text{NO}_2)$                      |       |                                                                        |

$\nu$ : stretching vibration;  $\delta$ : deformation vibration;  $\tau$ : torsional vibration;  $\gamma$ : ring structural deformation and combined with adjacent non-ring bond;  $\omega$ : wag out of plane;  $\rho$ : rocking in plane; as: anti-symmetric; s: symmetric.
